# Supplementary material for: Live-Cell Imaging of Phosphoinositide Dynamics and Membrane Architecture during Legionella Infection
Source: PubMed Central journal article supplement — mBio. 2014 Jan 28;5(1):e00839-13. doi: 10.1128/mBio.00839-13 (PMC3903275; doi:10.1128/mbio.00839-13), 2014-01-28
Supplement: mbo006131704st1.pdf [file mbo006131704st1.pdf]

**Supplementary Table S1.** Strains and plasmids.

| Strain/plasmid           | Relevant properties <sup>a</sup>                                                                 | Reference             |
|--------------------------|--------------------------------------------------------------------------------------------------|-----------------------|
| <i>E. coli</i>           |                                                                                                  |                       |
| TOP10                    |                                                                                                  | Invitrogen            |
| <i>L. pneumophila</i>    |                                                                                                  |                       |
| GS3011                   | <i>L. pneumophila</i> JR32 <i>icmT3011::Kan<sup>R</sup></i> ( $\Delta$ <i>icmT</i> )             | (1)                   |
| JR32                     | Virulent <i>L. pneumophila</i> serogroup 1 strain Philadelphia                                   | (2)                   |
| <i>D. discoideum</i>     |                                                                                                  |                       |
| Ax3                      |                                                                                                  | Laboratory collection |
| Ax2                      | PH-PLC $\delta$ 1-GFP                                                                            | (3)                   |
| Plasmids                 |                                                                                                  |                       |
| pBsrH                    | P <sub>act15</sub> , C-terminal-mRFPmars, Bls <sup>R</sup>                                       | (4)                   |
| pCaln-GFP                | P <sub>act15</sub> , <i>cnxA</i> -RSSSKLK-GFP (S65T), G418 <sup>R</sup>                          | (5)                   |
| pDXA-HC                  | <i>Dictyostelium</i> expression vector, P <sub>act15</sub> , Neo <sup>R</sup> , Amp <sup>R</sup> | (6)                   |
| pMMB207C                 | <i>Legionella</i> expression vector, $\Delta$ <i>mobA</i> , w/o RBS, Cam <sup>R</sup>            | (7)                   |
| pNT28                    | pMMB207C-RBS- <i>gfp</i> (constitutive <i>gfp</i> )                                              | (8)                   |
| pPH <sub>CRAC</sub> -GFP | PH <sub>CRAC</sub> -GFP (PH domain of protein CRAC), G418 <sup>R</sup>                           | (9)                   |
| pRM006                   | 2×FYVE-GFP in pDXA (FYVE domain of EEA-1), G418 <sup>R</sup>                                     | This work             |
| pSU04                    | GFP-P4C <sub>SidC</sub> in pDXA, G418 <sup>R</sup>                                               | (10)                  |
| pSW001                   | pMMB207C, $\Delta$ <i>lacI<sup>q</sup></i> (constitutive <i>dsred</i> )                          | (11)                  |
| pSW102                   | MCS- <i>gfp</i> in pDXA, G418 <sup>R</sup>                                                       | (12)                  |
| pWS021                   | Calnexin-mRFPmars, Bls <sup>R</sup>                                                              | This work             |
| pWS022                   | P4C <sub>SidC</sub> -mRFPmars (P4C domain of <i>L. pneumophila</i> SidC), Bls <sup>R</sup>       | This work             |

<sup>a</sup> Abbreviations: Amp, ampicillin; Bls, blasticidin S; Cam, chloramphenicol; G418, geneticin; Kan, kanamycin; Neo, neomycin.

## References

1. **Segal G, Shuman HA.** 1998. Intracellular multiplication and human macrophage killing by *Legionella pneumophila* are inhibited by conjugal components of IncQ plasmid RSF1010. *Mol Microbiol* **30**:197-208.

2. **Sadosky AB, Wiater LA, Shuman HA.** 1993. Identification of *Legionella pneumophila* genes required for growth within and killing of human macrophages. *Infect Immun* **61**:5361-5373.
3. **Clarke M, Engel U, Giorgione J, Müller-Taubenberger A, Prassler J, Veltman D, Gerisch G.** 2010. Curvature recognition and force generation in phagocytosis. *BMC Biol* **8**:154.
4. **Fischer M, Haase I, Simmeth E, Gerisch G, Müller-Taubenberger A.** 2004. A brilliant monomeric red fluorescent protein to visualize cytoskeleton dynamics in *Dictyostelium*. *FEBS Letters* **577**:227-232.
5. **Müller-Taubenberger A, Lupas AN, Li H, Ecke M, Simmeth E, Gerisch G.** 2001. Calreticulin and calnexin in the endoplasmic reticulum are important for phagocytosis. *EMBO J* **20**:6772-6782.
6. **Manstein DJ, Schuster HP, Morandini P, Hunt DM.** 1995. Cloning vectors for the production of proteins in *Dictyostelium discoideum*. *Gene* **162**:129-134.
7. **Weber SS, Ragaz C, Reus K, Nyfeler Y, Hilbi H.** 2006. *Legionella pneumophila* exploits PI(4)P to anchor secreted effector proteins to the replicative vacuole. *PLoS Pathog* **2**:e46.
8. **Tiaden A, Spirig T, Weber SS, Brüggemann H, Bosshard R, Buchrieser C, Hilbi H.** 2007. The *Legionella pneumophila* response regulator LqsR promotes host cell interactions as an element of the virulence regulatory network controlled by RpoS and LetA. *Cell Microbiol* **9**:2903-2920.
9. **Parent CA, Blacklock BJ, Froehlich WM, Murphy DB, Devreotes PN.** 1998. G-protein signaling events are activated at the leading edge of chemotactic cells. *Cell* **95**:81-91.
10. **Ragaz C, Pietsch H, Urwyler S, Tiaden A, Weber SS, Hilbi H.** 2008. The *Legionella pneumophila* phosphatidylinositol-4 phosphate-binding type IV substrate SidC recruits endoplasmic reticulum vesicles to a replication-permissive vacuole. *Cell Microbiol* **10**:2416-2433.
11. **Mampel J, Spirig T, Weber SS, Haagensen JAJ, Molin S, Hilbi H.** 2006. Planktonic replication is essential for biofilm formation by *Legionella pneumophila* in a complex medium under static and dynamic flow conditions. *Appl Environ Microbiol* **72**:2885-2895.
12. **Weber SS, Ragaz C, Hilbi H.** 2009. The inositol polyphosphate 5-phosphatase OCRL1 restricts intracellular growth of *Legionella*, localizes to the replicative vacuole and binds to the bacterial effector LpnE. *Cell Microbiol* **11**:442-460.
